# Supplementary material for: A stable bis(methylene)-λ4-selane with a >CSeC< bond containing Se(iv)
Source: Royal Society of Chemistry journal article supplement (doi:10.1039/c9cc04121d), 2019-01-01
Supplement: c9cc04121d1.pdf [file c9cc04121d1.pdf]

Supporting Information

**A Stable Bis(methylene)- $\lambda^4$ -selane with a  $>\text{C}=\text{Se}=\text{C}<$   
bond containing Se(IV)**

**Table of Contents**

|                                                                   |    |
|-------------------------------------------------------------------|----|
| <b>General Procedure</b> .....                                    | 2  |
| <b>NMR Spectroscopic Analysis</b> .....                           | 3  |
| <b>X-ray Crystallographic Analysis of 1, 12, 13, and 14</b> ..... | 12 |
| <b>Computational Details</b> .....                                | 15 |
| <b>Kinetic Experiment</b> .....                                   | 16 |
| <b>Electrochemical experiments</b> .....                          | 17 |
| <b>References</b> .....                                           | 18 |

**General Procedure**

Unless otherwise noted, all experiments were performed under an argon atmosphere.  $^1\text{H}$  (400 MHz) and  $^{13}\text{C}$  NMR (100 MHz) spectra were measured in  $\text{CDCl}_3$  and  $\text{C}_6\text{D}_5\text{CD}_3$  on a JEOL JNM ECS-400SS spectrometer. A signal arising from residual  $\text{CHCl}_3$  (7.26 ppm) in benzene- $d_6$  and  $\text{C}_6\text{D}_5\text{CD}_2\text{H}$  (2.08 ppm) in toluene- $d_8$  were used as an internal standard for the  $^1\text{H}$  NMR spectra, respectively, and that of  $\text{CDCl}_3$  (77.26 ppm) and  $\text{C}_6\text{D}_5\text{CD}_3$  (20.43 ppm) for the  $^{13}\text{C}$  NMR spectra.  $^{29}\text{Si}$  NMR (79 MHz) spectra were measured in  $\text{C}_6\text{D}_6$  using  $\text{Si}(\text{CH}_3)_4$  (0 ppm) as an external standard.  $^{77}\text{Se}$  NMR (76 MHz) spectra were measured in  $\text{C}_6\text{D}_6$  using  $\text{Me}_2\text{Se}$  (0 ppm) as an external standard.

High-resolution mass spectra (HRMS) were recorded on a JEOL JMS-T100LP (ESI) mass spectrometer. All melting points were measured on a SMP-300CT capillary melting point apparatus and are uncorrected.

**Synthesis of Bis(methylene)- $\lambda^4$ -selane (1):** A THF solution (6 mL) of (MePh<sub>2</sub>Si)<sub>2</sub>CBr<sub>2</sub> (572 mg, 1.01 mmol) at  $-78$  °C was treated dropwise with *t*-BuLi (1.64 M in pentane, 1.21 mL, 2.00 mmol) under vigorous stirring. After stirring for 5 min at this temperature, selenium powder (36 mg, 0.46 mmol) was added and the reaction mixture was allowed to warm to room temperature, where stirring was continued for 1 h. Subsequently, all volatiles were removed under reduced pressure, and the residue was dissolved in CH<sub>2</sub>Cl<sub>2</sub> and filtered through Celite®. The filtrate was evaporated to dryness, and the residue was re-precipitated from CH<sub>3</sub>CN to afford **1** as a purple solid (265 mg, 0.30 mmol, 59 %). mp.  $130$  °C (dec.); <sup>1</sup>H NMR (400 MHz, toluene-*d*<sub>8</sub>, 298 K)  $\delta$  0.42 (brs, 12H), 7.0–7.2 (m, 24H, Ar-H), 7.3–7.5 (m, 16H, Ar-H); <sup>13</sup>C NMR (100 MHz, toluene-*d*<sub>8</sub>, 298 K),  $\delta$   $-0.24$ , 127.9, 129.2, 135.8, 138.2, 166.7 (<sup>1</sup>*J*<sub>Se-C</sub> = 215 Hz, <sup>1</sup>*J*<sub>Si-C</sub> = 51 Hz, >C=Se); <sup>29</sup>Si NMR (79 MHz, toluene-*d*<sub>8</sub>, 298 K),  $\delta$   $-11.1$ ; <sup>77</sup>Se NMR (76 MHz, toluene-*d*<sub>8</sub>, 298 K),  $\delta$  1501; Anal. Calcd for C, 72.69; H, 5.87; found: C, 71.16; H, 5.95; HRMS (DART) found: *m/z* = 893.2393 ([M+H]<sup>+</sup>). Calcd for C<sub>54</sub>H<sub>52</sub>SSi<sub>4</sub> 893.2397 ([M+H]<sup>+</sup>). UV-vis (toluene):  $\lambda$  = 523 nm ( $\epsilon$  6,700).

**Reaction of 1 with HCl:** A CH<sub>2</sub>Cl<sub>2</sub> solution (10 mL) of **1** (104 mg, 0.12 mmol) at  $-78$  °C was treated with HCl (0.8 M in dioxane, 0.60 mL, 0.12 mmol). After 30 min, all volatiles were removed under reduced pressure, and the residue was recrystallized from Et<sub>2</sub>O to afford **12** as a colorless solid (86 mg, 0.093 mmol, 79%). HCl-adduct **12**: mp.  $79$  °C (dec.); <sup>1</sup>H NMR (400 MHz, CDCl<sub>3</sub>, 298 K)  $\delta$   $-0.26$  (s, 6H), 0.22 (s, 6H), 2.77 (s, 1H), 7.04 (d, 4H), 7.13(t, 4H), 7.15–7.30 (m, 16 H), 7.41 (t, 2H), 7.47 (t, 4H), 7.45–7.55 (m, 6H), 7.77 (d, 4H); <sup>13</sup>C NMR (100 MHz, CDCl<sub>3</sub>, 298 K),  $\delta$   $-3.55$ ,  $-1.10$ , 10.6 (s, <sup>1</sup>*J*<sub>Se-C</sub> = 90 Hz, <sup>1</sup>*J*<sub>Si-C</sub> = 44 Hz), 52.1, 127.3, 127.3, 127.4, 127.8, 128.9, 129.0, 129.6, 129.9, 135.2, 135.4, 136.0, 136.1, 136.4, 137.1, 137.3, 137.5; <sup>77</sup>Se NMR (76 MHz, CDCl<sub>3</sub>),  $\delta$  375.

**Reaction of 1 with SO<sub>2</sub>Cl<sub>2</sub>:** A CH<sub>2</sub>Cl<sub>2</sub> solution (5 mL) of **1** (57 mg, 0.064 mmol) at  $-78$  °C was treated with SO<sub>2</sub>Cl<sub>2</sub> in CH<sub>2</sub>Cl<sub>2</sub> (0.12 M, 0.5 mL, 0.064 mmol). After stirring for 30 min at room temperature, all volatiles were removed under reduced pressure, and the residue was recrystallized from Et<sub>2</sub>O to afford **13** as a colorless solid (46 mg, 0.048 mmol, 75%). mp.  $107$  °C (dec.); <sup>1</sup>H NMR (400 MHz, CDCl<sub>3</sub>)  $\delta$  0.07 (s, 12H), 7.20–7.30 (m, 16H), 7.43 (t, 8H), 7.50 (d, 8H), 7.58 (d, 8H); <sup>13</sup>C NMR (100 MHz, CDCl<sub>3</sub>)  $\delta$   $-2.42$ , 56.4 (s, <sup>1</sup>*J*<sub>Se-C</sub> = 134 Hz, <sup>1</sup>*J*<sub>Si-C</sub> = 42 Hz), 127.3, 127.4, 129.4, 129.7, 135.0, 136.3, 136.6, 137.1; <sup>77</sup>Se NMR (76 MHz, CDCl<sub>3</sub>),  $\delta$  621.

**Reaction of 1 with Br<sub>2</sub>:** A CH<sub>2</sub>Cl<sub>2</sub> solution (13 mL) of **1** (135 mg, 0.15 mmol) at -78 °C was treated with Br<sub>2</sub> in CH<sub>2</sub>Cl<sub>2</sub> (0.10 M, 1.5 mL, 0.15 mmol). After stirring for 30 min at room temperature, all volatiles were removed under reduced pressure, and the residue was recrystallized from Et<sub>2</sub>O to afford **14** as a colorless solid (160 mg, 0.15 mmol, 99%). mp. 128 °C (dec.); <sup>1</sup>H NMR (400 MHz, CDCl<sub>3</sub>) δ 0.21 (s, 12H), 7.25-7.35 (m, 16H), 7.40-7.50 (m, 8H), 7.50-7.60 (m, 16H); <sup>13</sup>C NMR (100 MHz, CDCl<sub>3</sub>), δ -0.58, 48.6 (s, <sup>1</sup>J<sub>Se-C</sub> = 142 Hz, <sup>1</sup>J<sub>Si-C</sub> = 39 Hz), 127.2, 127.3, 129.3, 129.7, 135.1, 136.3, 136.8, 137.5; <sup>77</sup>Se NMR (76 MHz, CDCl<sub>3</sub>), δ 511.

## NMR Spectroscopic Analysis

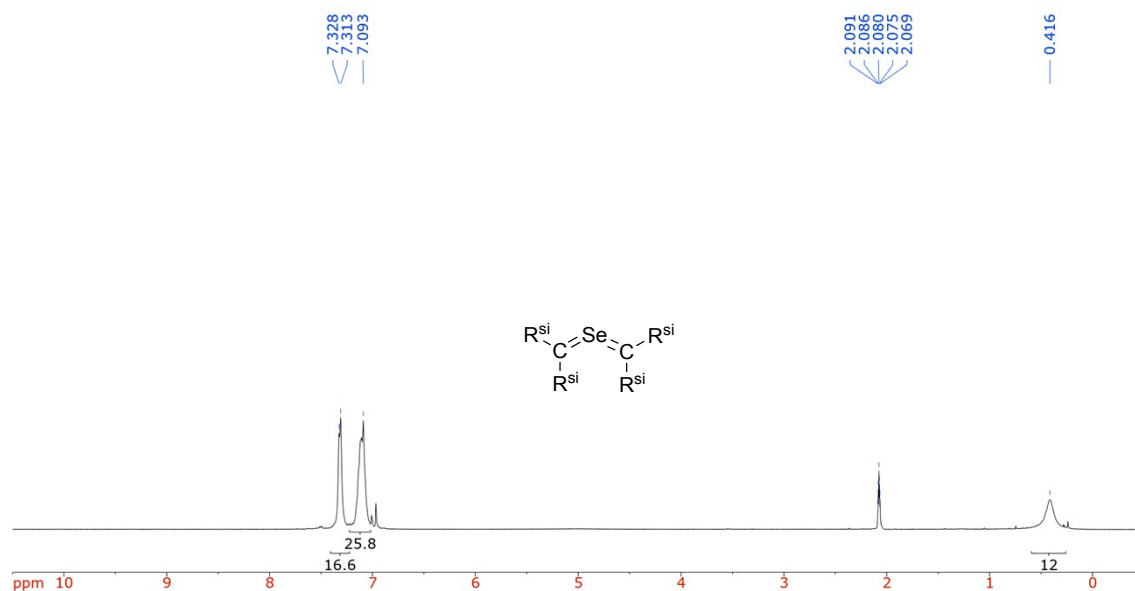

**Figure S1.**  $^1\text{H}$  NMR spectrum of **1** (400 MHz, toluene- $d_8$ , 298 K)

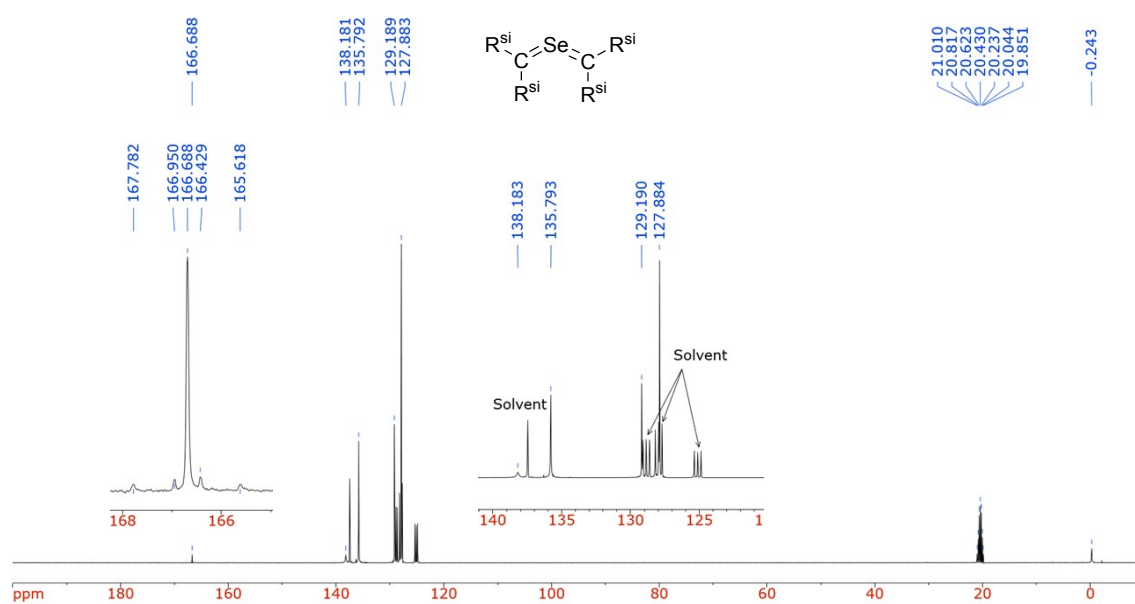

**Figure S2.**  $^{13}\text{C}$  NMR spectrum of **1** (100 MHz, toluene- $d_8$ , 298 K)

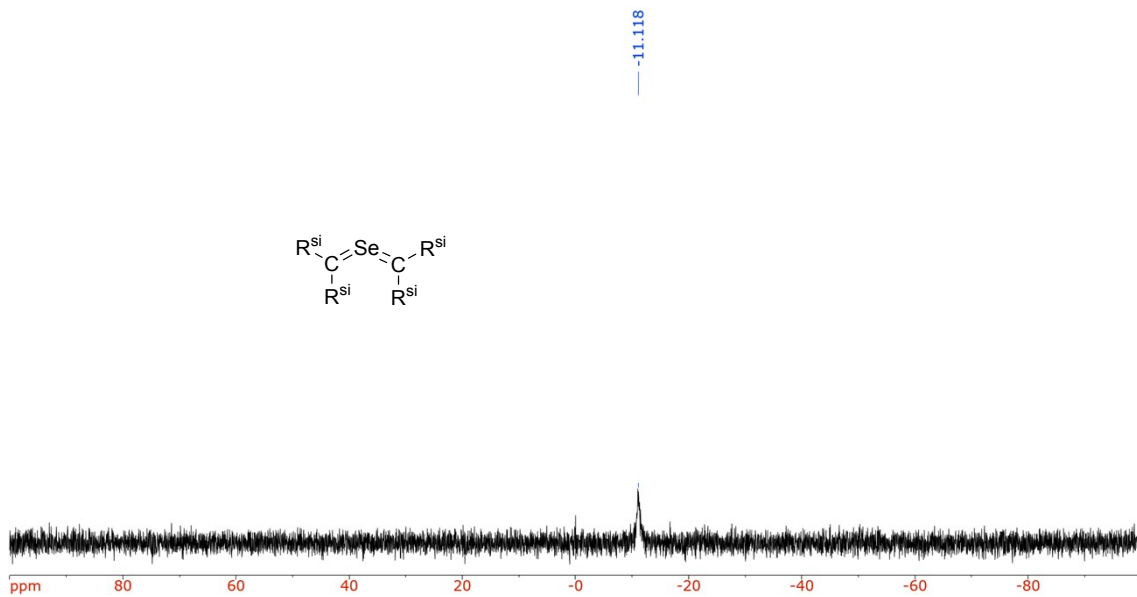

**Figure S3.**  $^{29}\text{Si}$  NMR spectrum of **1** (79 MHz, toluene- $d_8$ , 298 K)

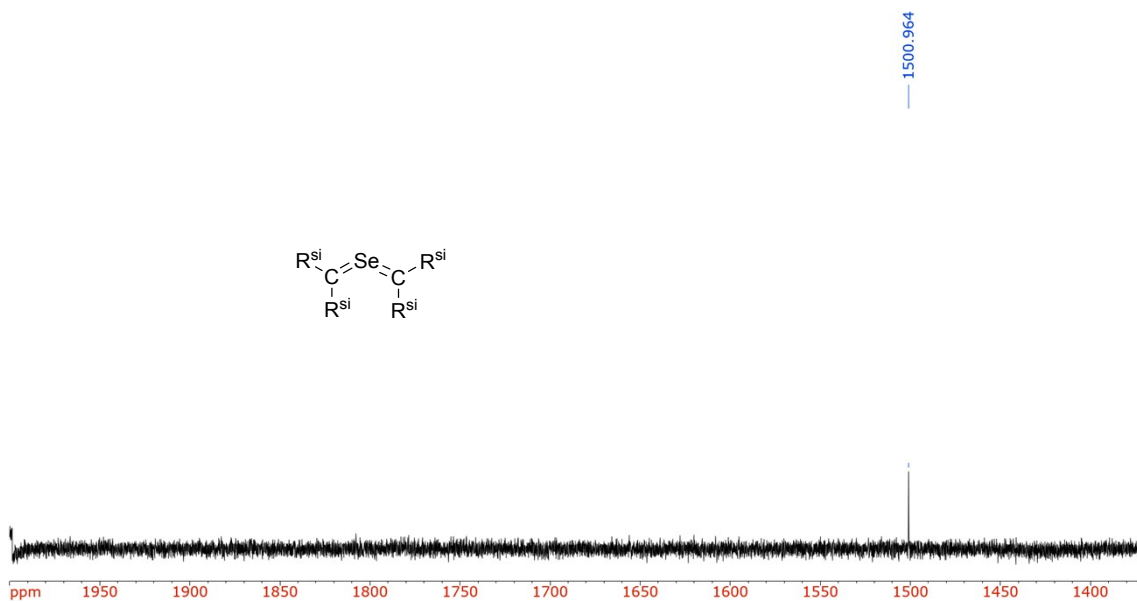

**Figure S4.**  $^{77}\text{Se}$  NMR spectrum of **1** (76 MHz, toluene- $d_8$ , 298 K)

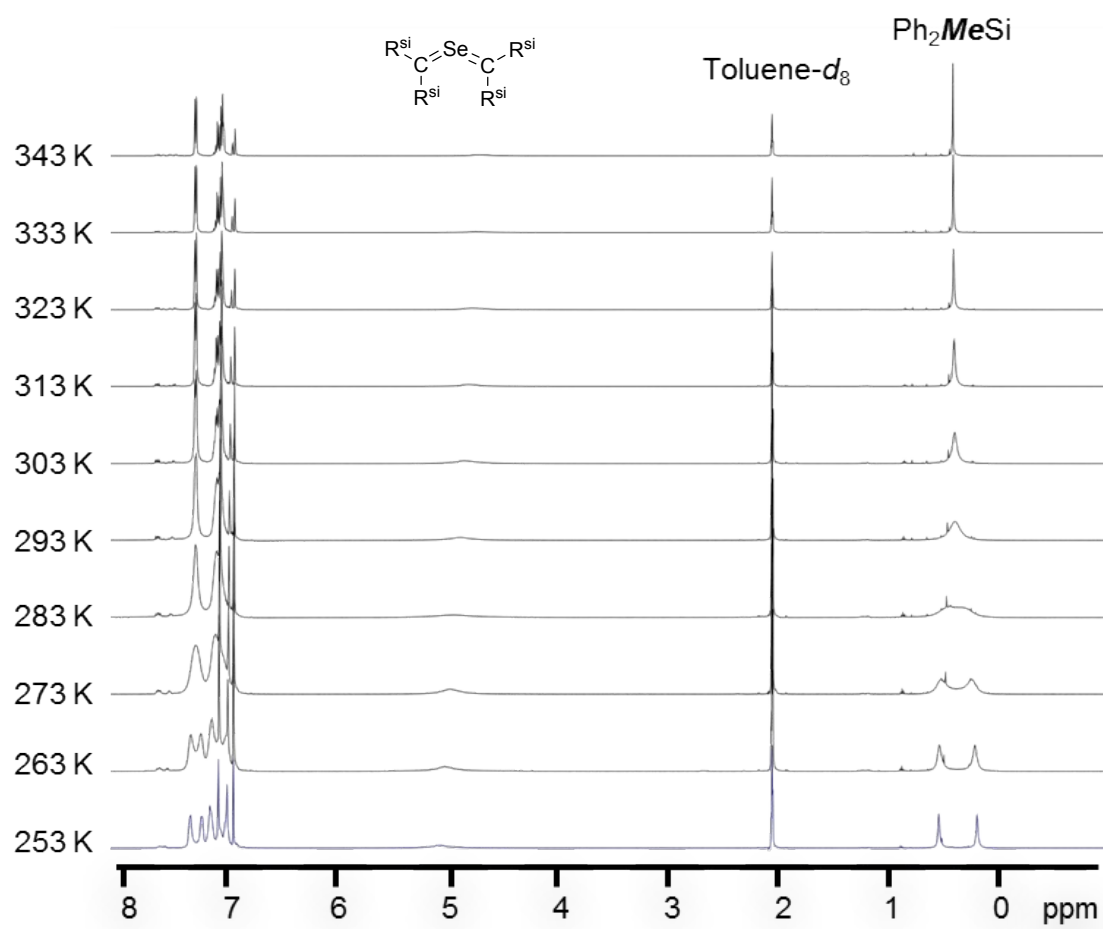

**Figure S5.** VT-<sup>1</sup>H NMR spectrum for **1** in toluene- $d_8$  (400 MHz)

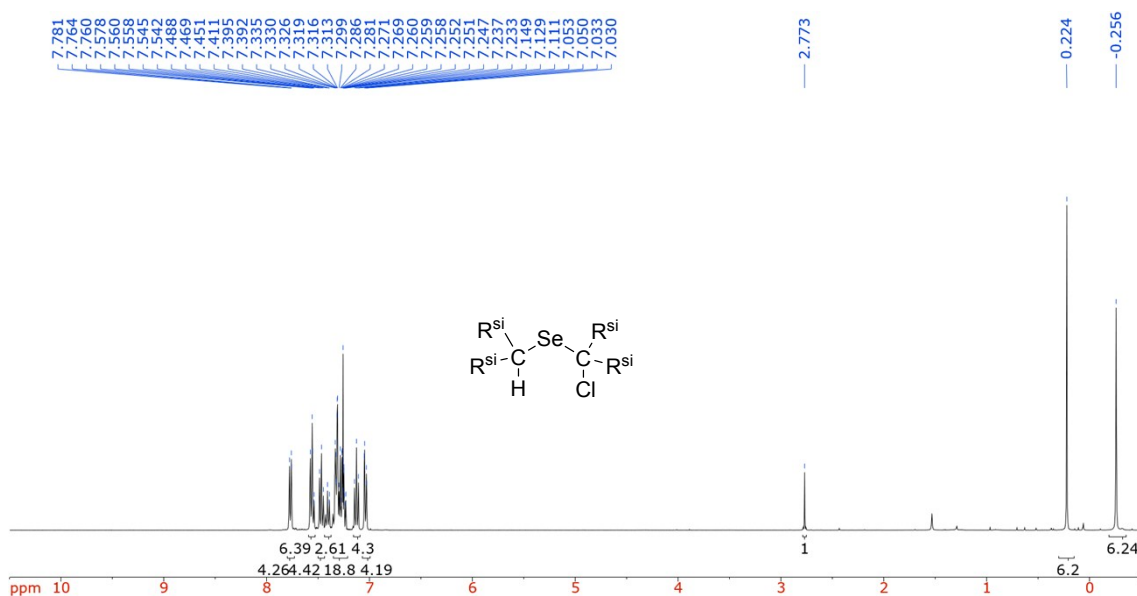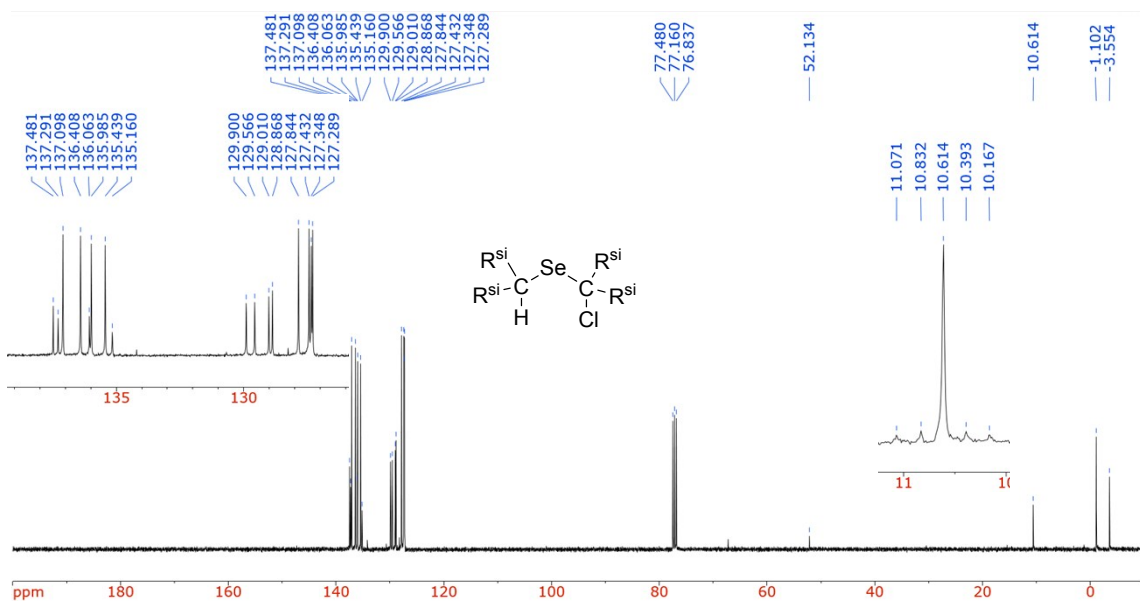

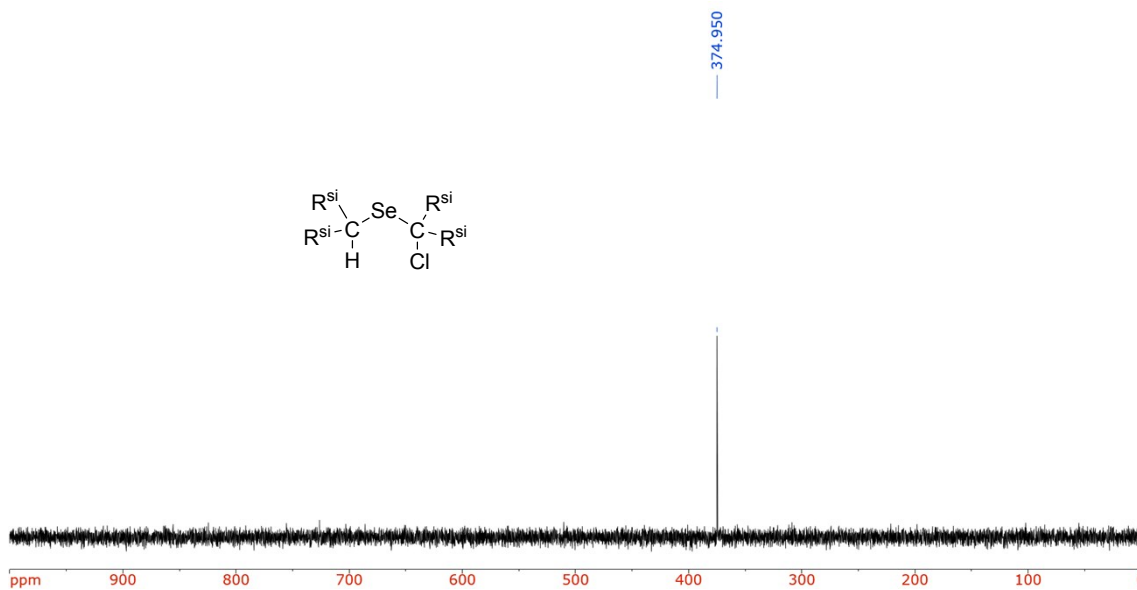

**Figure S8.**  $^{77}\text{Se}$  NMR spectrum for **12** in  $\text{CDCl}_3$  (76 MHz)

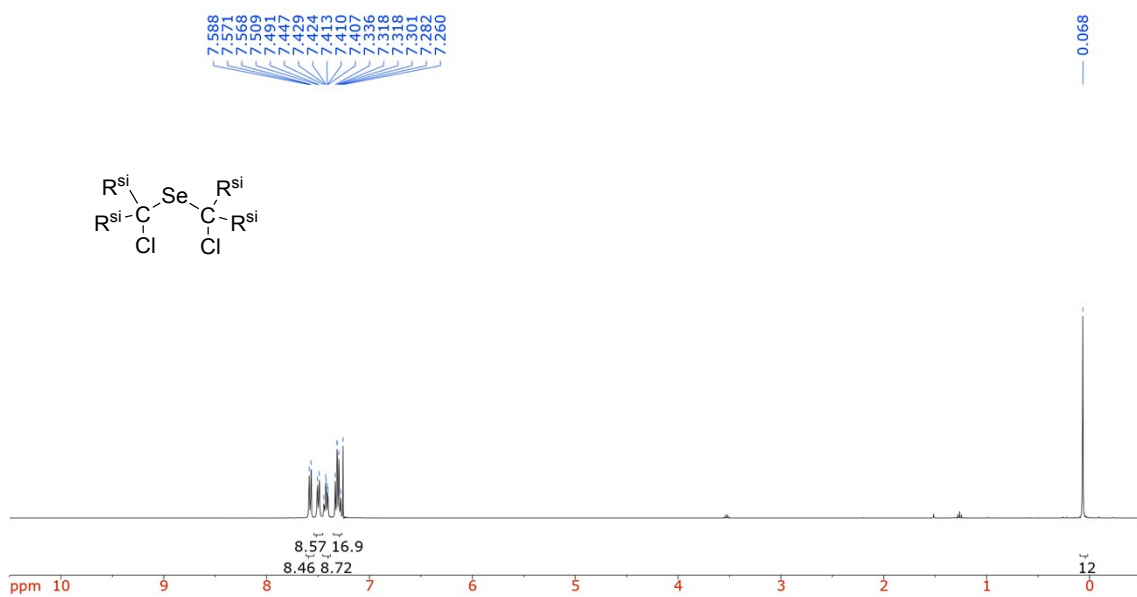

**Figure S9.**  $^1\text{H}$  NMR spectrum for **13** in  $\text{CDCl}_3$  (400 MHz)



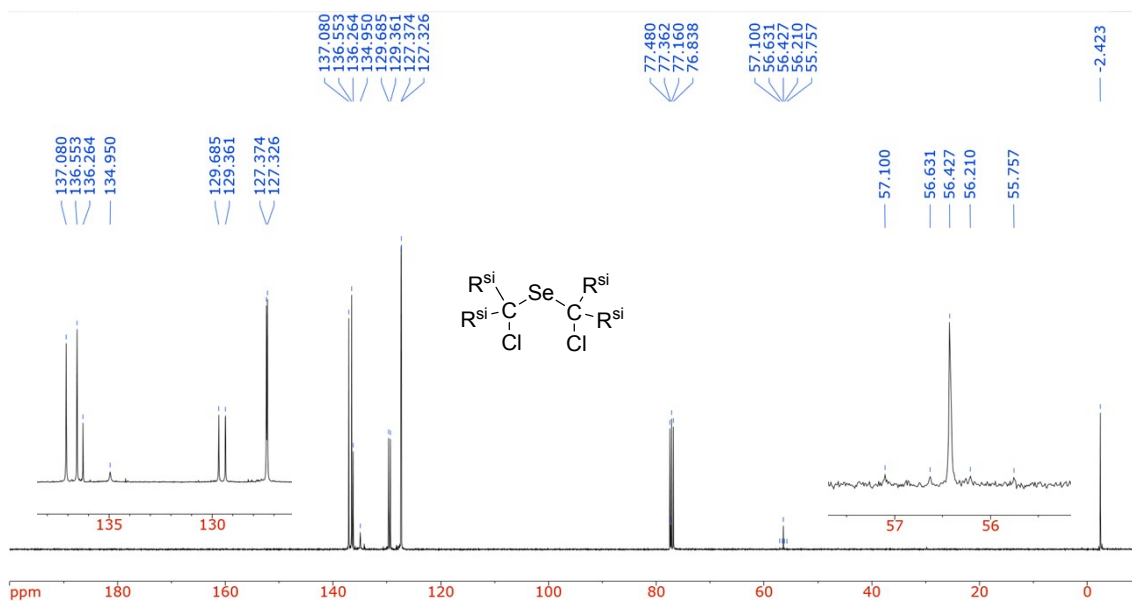

**Figure S10.**  $^{13}\text{C}$  NMR spectrum for **13** in  $\text{CDCl}_3$  (100 MHz)

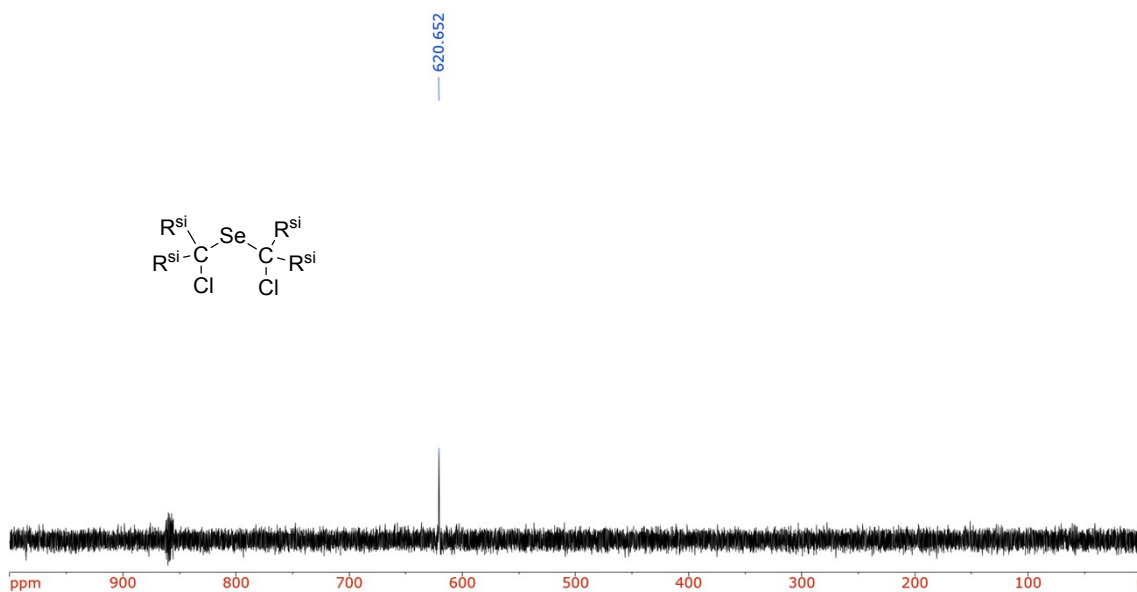

**Figure S11.**  $^{77}\text{Se}$  NMR spectrum for **13** in  $\text{CDCl}_3$  (76 MHz)

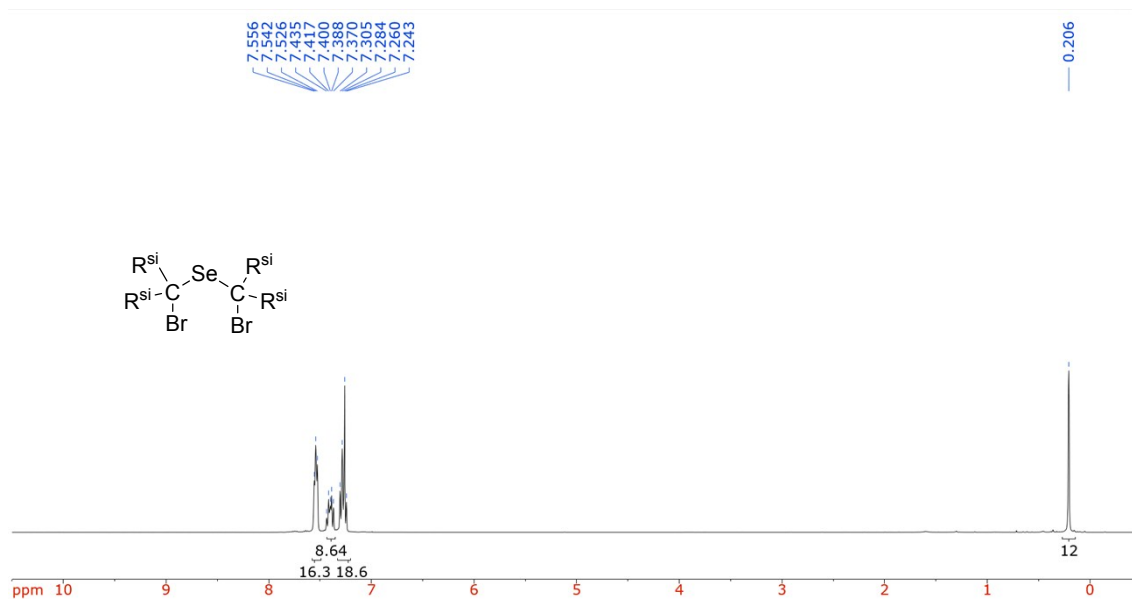

**Figure S12.** <sup>1</sup>H NMR spectrum for **14** in CDCl<sub>3</sub> (400 MHz)

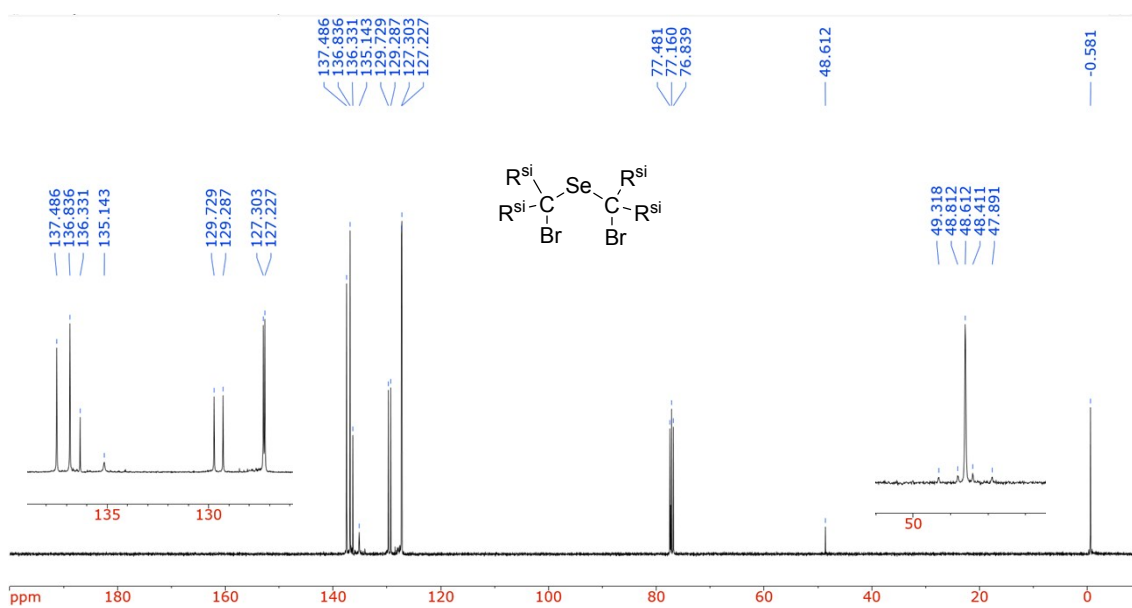

**Figure S13.** <sup>13</sup>C NMR spectrum for **14** in CDCl<sub>3</sub> (100 MHz)

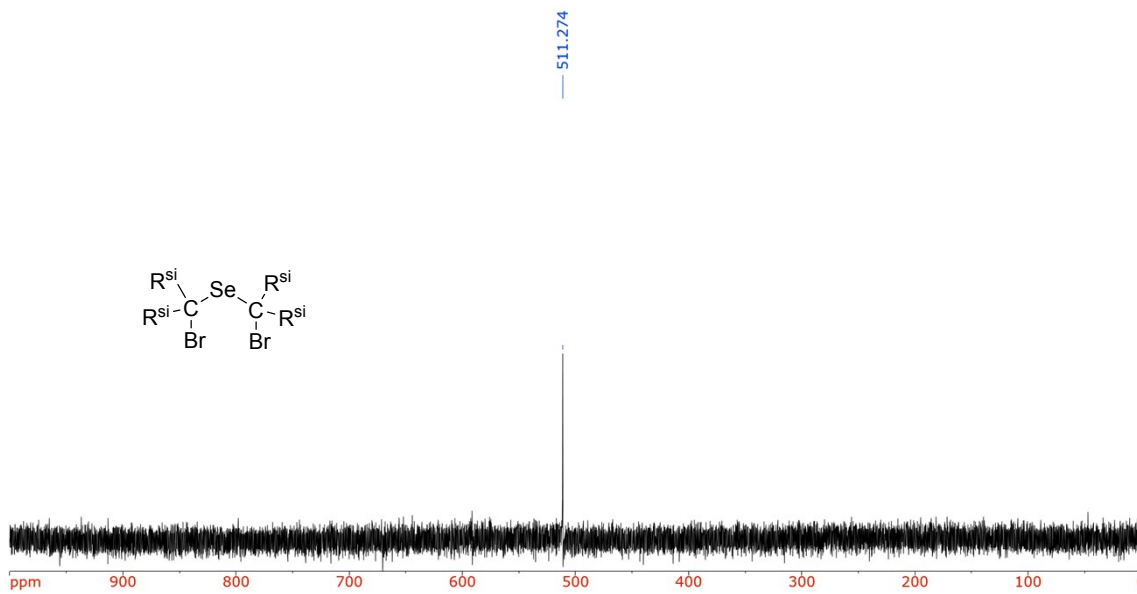

**Figure S14.**  $^{77}\text{Se}$  NMR spectrum for **14** in  $\text{CDCl}_3$  (76 MHz)

## X-ray Crystallographic Analysis of **1**, **12**, **13**, and **14**

Single crystals of **1** was grown by slow recrystallization of the Hexane solutions at -4 °C. Suitable single crystals of **12**, **13**, and **14** were grown by slow recrystallization of the Et<sub>2</sub>O solutions at room temperature. The structures were solved by a direct method (SHELXT)<sup>[S2]</sup> and refined by full-matrix least square method on F<sup>2</sup> for all reflections (SHELXL-2016).<sup>[S3]</sup> All hydrogen atoms were placed using AFIX instructions, while the other atoms were refined anisotropically. The supplementary crystallographic information for this paper has been deposited at The Cambridge Crystallographic Data Centre (CCDC) under the reference numbers CCDC-1916133 (**1**), CCDC-1916134 (**12**), CCDC-1916132 (**13**), CCDC-1916135 (**14**).

**Table S1** Crystal data and data collections of **1**, **12**, **13**, and **14**.

|                                          | CSeC ( <b>1</b> )                                 | HCl adduct ( <b>12</b> )                            | Cl <sub>2</sub> adduct ( <b>13</b> )                              | Br <sub>2</sub> adduct ( <b>14</b> )                                                 |
|------------------------------------------|---------------------------------------------------|-----------------------------------------------------|-------------------------------------------------------------------|--------------------------------------------------------------------------------------|
| empirical formula                        | C <sub>54</sub> H <sub>52</sub> SeSi <sub>4</sub> | C <sub>54</sub> H <sub>53</sub> ClSeSi <sub>4</sub> | C <sub>54</sub> H <sub>52</sub> Cl <sub>2</sub> SeSi <sub>4</sub> | C <sub>54</sub> H <sub>52</sub> Br <sub>2</sub> SeSi <sub>4</sub> •Et <sub>2</sub> O |
| formula weight                           | 892.27                                            | 928.73                                              | 963.17                                                            | 1126.21                                                                              |
| color                                    | purple                                            | colourless                                          | colourless                                                        | colourless                                                                           |
| crystal system                           | monoclinic                                        | monoclinic                                          | monoclinic                                                        | monoclinic                                                                           |
| space group                              | <i>P</i> 2 <sub>1</sub> / <i>n</i> (#14)          | <i>P</i> 2 <sub>1</sub> / <i>n</i> (#14)            | <i>P</i> 2 <sub>1</sub> / <i>n</i> (#14)                          | <i>P</i> 2 <sub>1</sub> / <i>c</i> (#14)                                             |
| unit-cell dimensions                     |                                                   |                                                     |                                                                   |                                                                                      |
| <i>a</i> (Å)                             | 12.7354(8)                                        | 17.3177(13)                                         | 17.4721(5)                                                        | 12.0334(4)                                                                           |
| <i>b</i> (Å)                             | 21.5853(14)                                       | 13.0257(8)                                          | 13.4080(5)                                                        | 20.0424(6)                                                                           |
| <i>c</i> (Å)                             | 17.4791(10)                                       | 21.8104(15)                                         | 21.0645(7)                                                        | 22.4788(6)                                                                           |
| $\alpha$ (°)                             | 90                                                | 90                                                  | 90                                                                | 90                                                                                   |
| $\beta$ (°)                              | 102.496(2)                                        | 105.764(8)                                          | 104.8770(10)                                                      | 91.4760(10)                                                                          |
| $\gamma$ (°)                             | 90                                                | 90                                                  | 90                                                                | 90                                                                                   |
| <i>V</i> (Å <sup>3</sup> )               | 4691.1(5)                                         | 4734.8(6)                                           | 4769.3(3)                                                         | 5419.6(3)                                                                            |
| <i>Z</i>                                 | 4                                                 | 4                                                   | 4                                                                 | 4                                                                                    |
| <i>D</i> (g/cm <sup>3</sup> )            | 1.263                                             | 1.303                                               | 1.341                                                             | 1.380                                                                                |
| independent reflections                  | 8658                                              | 9304                                                | 8865                                                              | 12402                                                                                |
| parameters                               | 536                                               | 555                                                 | 554                                                               | 601                                                                                  |
| <i>R</i> 1, <i>wR</i> 2                  | 0.0544, 0.1446                                    | 0.0626, 0.1428                                      | 0.0315, 0.0697                                                    | 0.0382, 0.0760                                                                       |
| goodness-of-fit on <i>F</i> <sup>2</sup> | 1.025                                             | 1.058                                               | 1.025                                                             | 1.024                                                                                |
| CCDC                                     | 1916133                                           | 1916134                                             | 1916132                                                           | 1916135                                                                              |

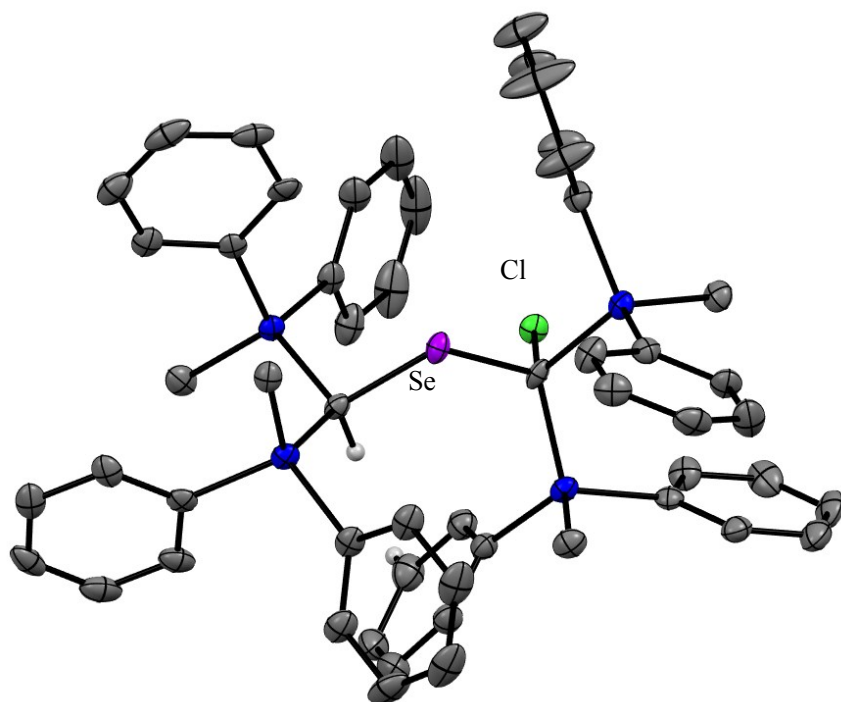

**Figure S15. Structure of Compound 12**

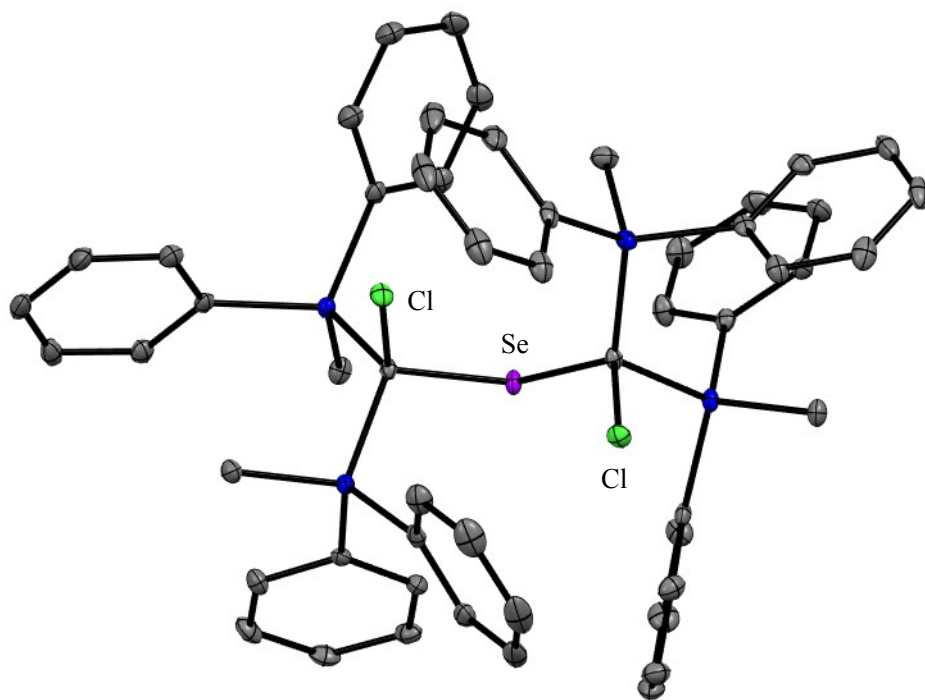

**Figure S16. Structure of Compound 13**

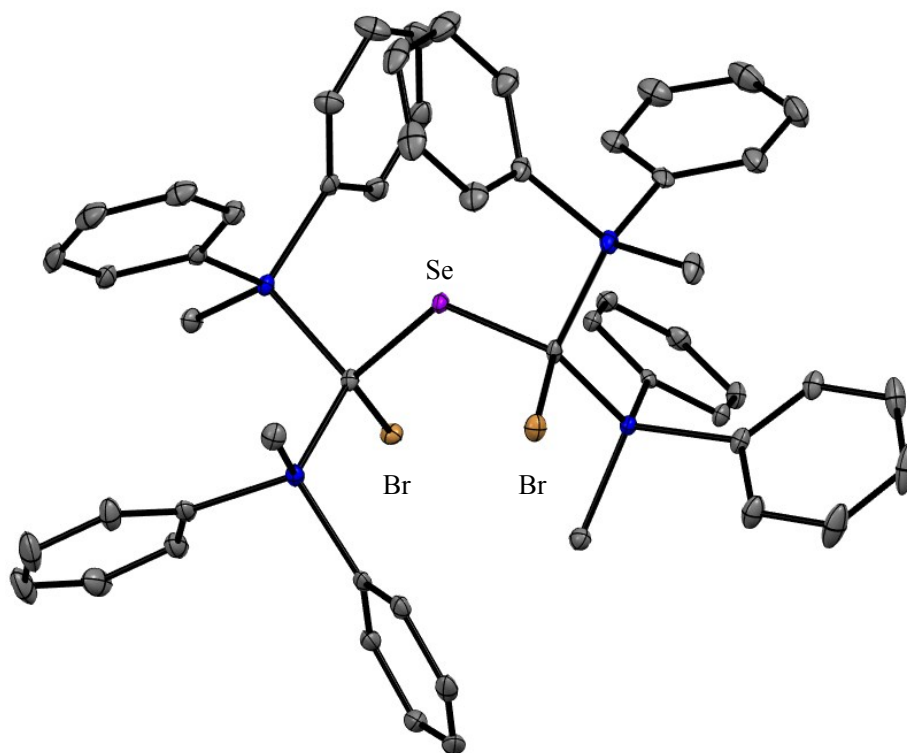

**Figure S17. Structure of Compound 14** (All hydrogens and solvent molecule are omitted for clarity.)

### Computational Details

All calculations were performed using the Gaussian 09 suite of programs, revision E 01.<sup>[S1]</sup> The geometry optimization and harmonic vibration frequency calculations of **1**, **1a-e** were performed in DFT method at B3PW91/6-311G(2d,p) level of theory. The frequency calculations confirmed minimum energies for the optimized structures. The optimized geometry of **1** is shown in Figure S6, and the selected optimized structural parameters are given in Table S1. Optimized structures are provided as a xyz file. Frontier orbitals of **1** is shown in Figures S6.

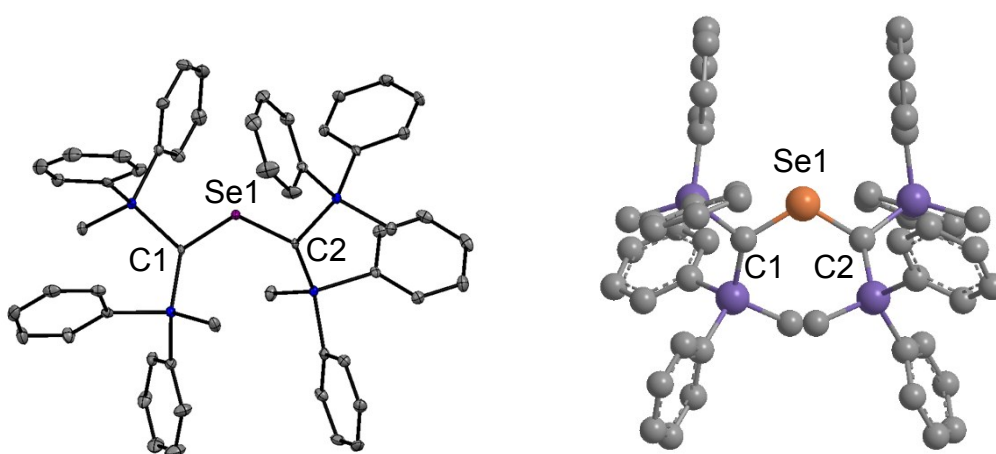

**Figure S18.** Molecular structure of **1** with ellipsoids at the 50% probability and calculated geometry for **1** at B3PW91/6-311G(2d,p) level. Hydrogen atoms omitted for clarity. For the comparison of the structural parameters obtained experimentally with those calculated, see Table S1.

Table S2. The bond parameters of the experimental and calculated values for compound **1**.

|            | Experimental values (Å, deg) | Calculated values(Å, deg) |
|------------|------------------------------|---------------------------|
| Se1-C1     | 1.811(4)                     | 1.846                     |
| Se1-C2     | 1.808(3)                     | 1.846                     |
| C1-Si1     | 1.886(4)                     | 1.883                     |
| C1-Si2     | 1.862(4)                     | 1.871                     |
| C2-Si3     | 1.886(4)                     | 1.871                     |
| C2-Si4     | 1.867(4)                     | 1.883                     |
| C1-Se1-C2  | 120.82(16)                   | 117.97                    |
| Se1-C1-Si1 | 104.82(18)                   | 109.42                    |

|            |            |        |
|------------|------------|--------|
| Se1-C1-Si2 | 124.24(19) | 124.82 |
| Si1-C1-Si2 | 125.7(2)   | 124.14 |
| Se1-C2-Si3 | 124.29(18) | 124.84 |
| Se1-C2-Si4 | 105.34(18) | 109.42 |
| Si3-C2-Si4 | 124.29(19) | 124.13 |

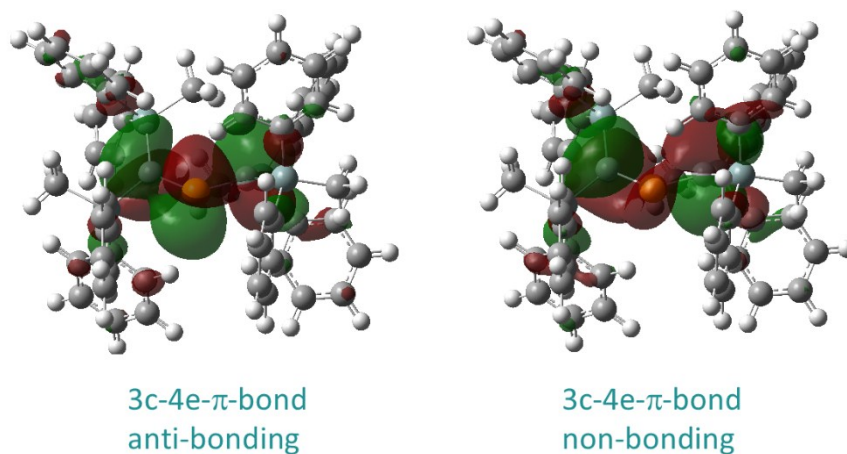

**Figure S19.** Frontier orbitals of **1** (B3PW91/6-311G(2d,p))

### Kinetic Experiment

Kinetic experiments were conducted to ascertain the rate of bond rotation of selane **1** and sulfane **2** in toluene using temperature as a function. Line shape analysis allowed the rotation rate constant ( $k$ ) values estimated at several temperatures from 243 to 323 K. The thermodynamic parameters of activation for the rotation between the carbon and chalcogen atoms were obtained from an Eyring plot analysis<sup>S4</sup> of **1** and **2**.



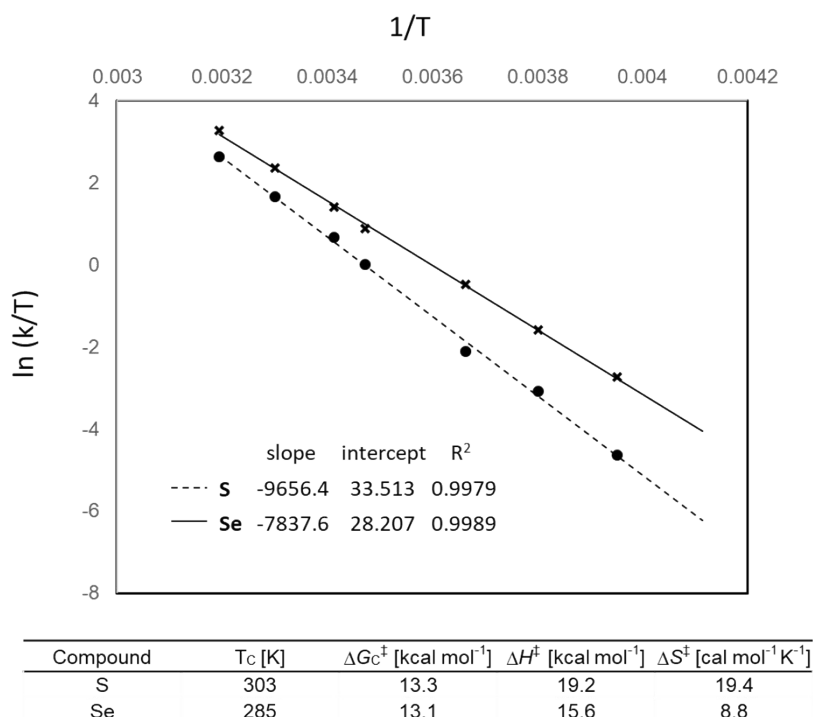

**Figure S20.** Eyring Plots of **1** and **2**.

### Electrochemical experiments

Electrochemical experiments were carried out on an ALS 600A potentiostat/galvanostat using Pt wire electrodes. Electrochemical samples were recorded with scan rates of 50 mVs<sup>-1</sup> at room temperature. Samples solutions in CH<sub>2</sub>Cl<sub>2</sub> were 1.0 mM in analyte and 0.1 M in [*n*-Bu<sub>4</sub>N][ClO<sub>4</sub>] as the supporting electrolyte.

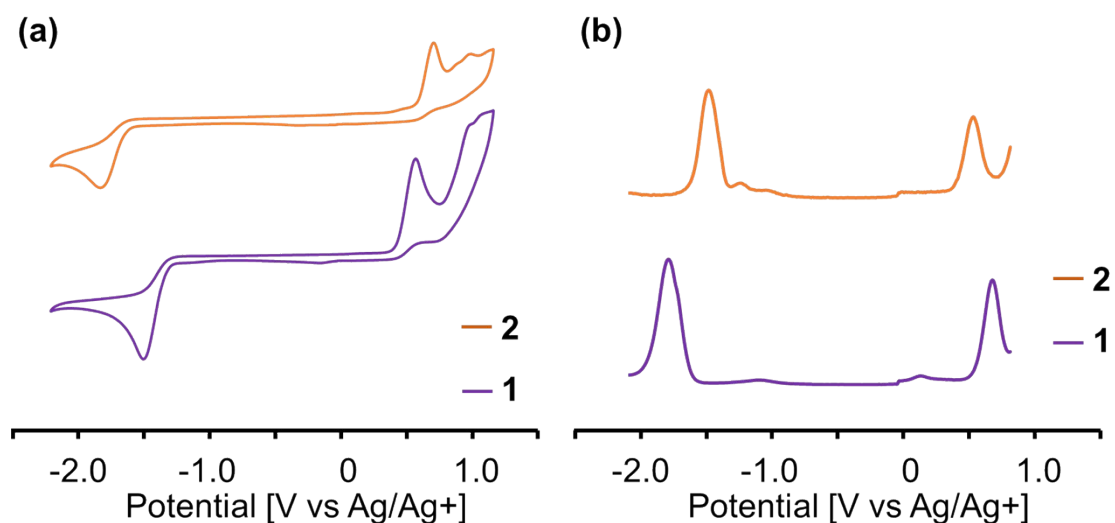

**Figure S21.** Cyclic and Differential Pulse Voltammograms of **1** and **2**

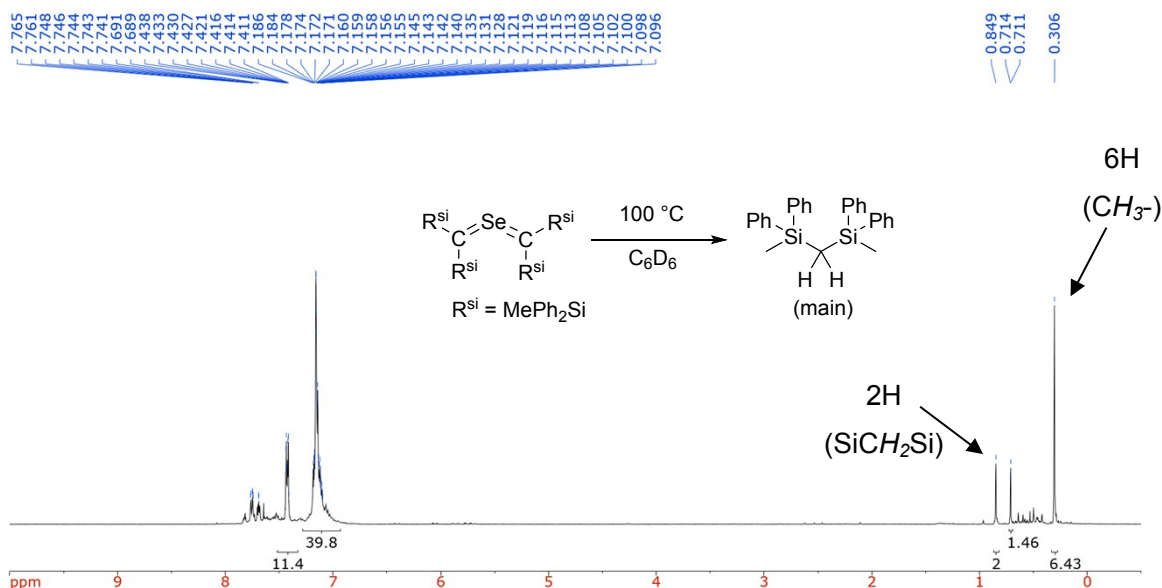

**Figure S22.** Thermolysis of Bis(methylene)- $\lambda^4$ -selane in  $\text{C}_6\text{D}_6$ .

## References

- [S1] Gaussian 09, Revision E.01, M. J. Frisch, G. W. Trucks, H. B. Schlegel, G. E. Scuseria, M. A. Robb, J. R. Cheeseman, G. Scalmani, V. Barone, B. Mennucci, G. A. Petersson, H. Nakatsuji, M. Caricato, X. Li, H. P. Hratchian, A. F. Izmaylov, J. Bloino, G. Zheng, J. L. Sonnenberg, M. Hada, M. Ehara, K. Toyota, R. Fukuda, J. Hasegawa, M. Ishida, T. Nakajima, Y. Honda, O. Kitao, H. Nakai, T. Vreven, J. A. Montgomery, Jr., J. E. Peralta, F. Ogliaro, M. Bearpark, J. J. Heyd, E. Brothers, K. N. Kudin, V. N. Staroverov, R. Kobayashi, J. Normand, K. Raghavachari, A. Rendell, J. C. Burant, S. S. Iyengar, J. Tomasi, M. Cossi, N. Rega, J. M. Millam, M. Klene, J. E. Knox, J. B. Cross, V. Bakken, C. Adamo, J. Jaramillo, R. Gomperts, R. E. Stratmann, O. Yazyev, A. J. Austin, R. Cammi, C. Pomelli, J. W. Ochterski, R. L. Martin, K. Morokuma, V. G. Zakrzewski, G. A. Voth, P. Salvador, J. J. Dannenberg, S. Dapprich, A. D. Daniels, Ö. Farkas, J. B. Foresman, J. V. Ortiz, J. Cioslowski, and D. J. Fox, Gaussian, Inc., Wallingford CT, 2009.
- [S2] Sheldrick, G. M. *Acta Crystallogr. Sect. A*, 2015, 71, 3-8.
- [S3] Sheldrick, G. M. *Acta Crystallogr. Sect. C*, 2015, 71, 3-8.
- [S4] Gasparro, F. P.; Kolodny, N. H. NMR Determination of the Rotational Barrier in N,N-Dimethylacetamide. *J. Chem. Educ.* **1977**, 54, 258–261.
